# Supplementary material
Source: PubMed Central journal article supplement (PMC3895641)
Supplement: ejhg2013122x3.pdf [file ejhg2013122x3.pdf]

Supplementary Table 1. Demographic information for FE groups in this study

| Filipino group     | Sample size | Geographical region | Island group | Political region | General language |
|--------------------|-------------|---------------------|--------------|------------------|------------------|
| Ivatan             | 29          | Northern            | Luzon        | 2                | Northern         |
| Ifugao             | 29          | Northern            | Luzon        | CAR              | Northern         |
| Kankanaey          | 30          | Northern            | Luzon        | CAR              | Northern         |
| Ibaloi             | 26          | Northern            | Luzon        | CAR              | Northern         |
| Kalangoya          | 26          | Northern            | Luzon        | 2                | Northern         |
| Bugkalot           | 30          | Northern            | Luzon        | 2                | Northern         |
| Aeta from Zambales | 10          | Northern            | Luzon        | 3                | Northern         |
| Aeta from Bataan   | 23          | Northern            | Luzon        | 3                | Northern         |
| Agta from Iriga    | 9           | Central             | Luzon        | 5                | Central          |
| Abaknon            | 30          | Central             | Visayas      | 8                | Southern         |
| Maranao            | 18          | Southern            | Mindanao     | ARMM             | Southern         |
| Surigaonon         | 24          | Southern            | Mindanao     | 13               | Central          |
| Mamanwa            | 33          | Southern            | Mindanao     | 13               | Southern         |
| Manobo             | 40          | Southern            | Mindanao     | 13               | Southern         |

Surigaonon, Mamanwa and Manobo data from Gunnarsdóttir *et al.* 2011a reanalyzed in this study

CAR: Cordillera Administrative Region

ARMM: Autonomous Region of Muslim Mindanao

Supplementary Table 2. DNA sequencing quality control information for FE group samples used in this study classified by population

| Sample  | Filipino group | DNA Library | DNA sample source  | Collection year | Number of sequencing reads | Reads mapped | Consensus sequence length | Minimum coverage | Sample Coverage | Maximum coverage | Average coverage | Number of gaps | Gap length | Number of N | Haplogroup        |
|---------|----------------|-------------|--------------------|-----------------|----------------------------|--------------|---------------------------|------------------|-----------------|------------------|------------------|----------------|------------|-------------|-------------------|
| lba2490 | lbaloi         | fred2       | buccal cells, swab | 1997            | 273689                     | 10560        | 16562                     | 5                | 48              | 88               | 248              | 0              | 0          | 0           | B5b1c             |
| lba2510 | lbaloi         | fred2       | buccal cells, swab |                 | 242676                     | 9870         | 16566                     | 9                | 45              | 78               |                  | 0              | 0          | 0           | M7c3c             |
| lba3659 | lbaloi         | fred2       | buccal cells, swab |                 | 771516                     | 22145        | 16568                     | 37               | 101             | 141              |                  | 0              | 0          | 0           | M7c3c             |
| lba3662 | lbaloi         | fred2       | buccal cells, swab |                 | 338528                     | 18088        | 16565                     | 17               | 82              | 124              |                  | 0              | 0          | 0           | F1a4a             |
| lba3670 | lbaloi         | fred2       | buccal cells, swab |                 | 343380                     | 10761        | 16568                     | 6                | 49              | 93               |                  | 0              | 0          | 0           | M7c3c             |
| lba925  | lbaloi         | fred2       | buccal cells, swab |                 | 461034                     | 16524        | 16568                     | 21               | 75              | 116              |                  | 0              | 0          | 0           | M7c3c             |
| lba927  | lbaloi         | fred2       | buccal cells, swab |                 | 564747                     | 17438        | 16568                     | 15               | 79              | 122              |                  | 0              | 0          | 0           | M7c3c             |
| lba928  | lbaloi         | fred2       | buccal cells, swab |                 | 323951                     | 16728        | 16568                     | 17               | 76              | 127              |                  | 0              | 0          | 0           | M7c3c             |
| lba929  | lbaloi         | fred2       | buccal cells, swab |                 | 490162                     | 19100        | 16571                     | 19               | 87              | 134              |                  | 0              | 0          | 0           | D5b1c             |
| lba930  | lbaloi         | fred2       | buccal cells, swab |                 | 391966                     | 13579        | 16569                     | 12               | 61              | 104              |                  | 0              | 0          | 0           | D5b1c             |
| lba931  | lbaloi         | fred2       | buccal cells, swab |                 | 388224                     | 11488        | 16566                     | 11               | 52              | 91               |                  | 0              | 0          | 0           | M7c3c             |
| lba934  | lbaloi         | fred2       | buccal cells, swab |                 | 276631                     | 10595        | 16569                     | 5                | 48              | 92               |                  | 0              | 0          | 0           | D5b1c             |
| lba945  | lbaloi         | fred2       | buccal cells, swab |                 | 376175                     | 12240        | 16560                     | 4                | 56              | 101              |                  | 0              | 0          | 0           | B4a1a             |
| lba951  | lbaloi         | fred2       | buccal cells, swab |                 | 334318                     | 13969        | 16568                     | 12               | 63              | 104              |                  | 0              | 0          | 0           | F3b               |
| lba952  | lbaloi         | fred2       | buccal cells, swab |                 | 602261                     | 16616        | 16555                     | 17               | 75              | 125              |                  | 0              | 0          | 0           | B4a1a             |
| lba954  | lbaloi         | fred2       | buccal cells, swab |                 | 1213381                    | 20946        | 16568                     | 22               | 94              | 219              |                  | 0              | 0          | 0           | M7c3c             |
| lba955  | lbaloi         | fred2       | buccal cells, swab |                 | 719136                     | 24794        | 16568                     | 36               | 112             | 161              |                  | 0              | 0          | 0           | M7c3c             |
| lba958  | lbaloi         | fred2       | buccal cells, swab |                 | 270921                     | 13883        | 16560                     | 11               | 63              | 107              |                  | 0              | 0          | 0           | B4a1a             |
| lba922  | lbaloi         | plate 7B    | buccal cells, swab |                 | 131426                     | 52219        | 16569                     | 80               | 237             | 436              |                  | 0              | 0          | 0           | F3b               |
| lba924  | lbaloi         | plate 7B    | buccal cells, swab |                 | 247625                     | 131609       | 16570                     | 191              | 598             | 931              |                  | 0              | 0          | 0           | F3b               |
| lba932  | lbaloi         | plate 7B    | buccal cells, swab |                 | 155388                     | 72851        | 16567                     | 94               | 330             | 633              |                  | 0              | 0          | 30          | M13'46'61-T16362C |
| lba933  | lbaloi         | plate 7B    | buccal cells, swab |                 | 403161                     | 209193       | 16568                     | 88               | 952             | 1447             |                  | 0              | 0          | 0           | E1a1a             |
| lba949  | lbaloi         | plate 7B    | buccal cells, swab |                 | 325699                     | 170566       | 16557                     | 173              | 770             | 4043             |                  | 0              | 0          | 1           | B4a1a             |
| lba950  | lbaloi         | plate 7B    | buccal cells, swab |                 | 293736                     | 160361       | 16564                     | 128              | 730             | 1130             |                  | 0              | 0          | 0           | F1a4a             |
| lba959  | lbaloi         | plate 7B    | buccal cells, swab |                 | 304320                     | 133938       | 16560                     | 142              | 609             | 1155             |                  | 0              | 0          | 1           | B5b1c             |
| lba962  | lbaloi         | plate 7B    | buccal cells, swab |                 | 393597                     | 209747       | 16565                     | 74               | 953             | 1578             |                  | 0              | 0          | 1           | B4a1a5            |
| lfu1020 | lfugao         | fred2       | buccal cells, swab | 1997            | 310571                     | 16830        | 16569                     | 18               | 77              | 123              | 377              | 0              | 0          | 0           | F3b               |
| lfu1024 | lfugao         | fred2       | buccal cells, swab |                 | 249539                     | 9262         | 16569                     | 5                | 42              | 79               |                  | 0              | 0          | 0           | M7c3c             |
| lfu1025 | lfugao         | fred2       | buccal cells, swab |                 | 502588                     | 17892        | 16568                     | 18               | 81              | 123              |                  | 0              | 0          | 0           | M7c3c             |
| lfu1027 | lfugao         | fred2       | buccal cells, swab |                 | 468222                     | 17989        | 16570                     | 14               | 82              | 126              |                  | 0              | 0          | 0           | Y2a1              |
| lfu1028 | lfugao         | fred2       | buccal cells, swab |                 | 392845                     | 15893        | 16562                     | 18               | 72              | 111              |                  | 0              | 0          | 0           | B5b1c             |
| lfu1030 | lfugao         | fred2       | buccal cells, swab |                 | 293060                     | 14521        | 16569                     | 8                | 66              | 115              |                  | 0              | 0          | 0           | M7c3c             |
| lfu1031 | lfugao         | fred2       | buccal cells, swab |                 | 381936                     | 19923        | 16560                     | 15               | 91              | 134              |                  | 0              | 0          | 0           | B4b1a2            |
| lfu1033 | lfugao         | fred2       | buccal cells, swab |                 | 328282                     | 14174        | 16568                     | 14               | 64              | 105              |                  | 0              | 0          | 0           | M7c3c             |
| lfu1037 | lfugao         | fred2       | buccal cells, swab |                 | 415275                     | 13938        | 16559                     | 15               | 63              | 98               |                  | 0              | 0          | 0           | B4a1a             |
| lfu1038 | lfugao         | fred2       | buccal cells, swab |                 | 461775                     | 19178        | 16562                     | 17               | 87              | 130              |                  | 0              | 0          | 0           | B5b1c             |
| lfu1042 | lfugao         | fred2       | buccal cells, swab |                 | 435318                     | 19730        | 16560                     | 22               | 90              | 130              |                  | 0              | 0          | 0           | B4a1a             |
| lfu1043 | lfugao         | fred2       | buccal cells, swab |                 | 364291                     | 19227        | 16558                     | 22               | 88              | 132              |                  | 0              | 0          | 0           | B4a1a5            |
| lfu1044 | lfugao         | fred2       | buccal cells, swab |                 | 661023                     | 20584        | 16569                     | 24               | 94              | 132              |                  | 0              | 0          | 0           | M7c3c             |
| lfu1047 | lfugao         | fred2       | buccal cells, swab |                 | 295016                     | 14655        | 16557                     | 12               | 67              | 108              |                  | 0              | 0          | 0           | B4a1a             |
| lfu1054 | lfugao         | fred2       | buccal cells, swab |                 | 351532                     | 16687        | 16569                     | 20               | 76              | 118              |                  | 0              | 0          | 0           | F3b               |
| lfu1055 | lfugao         | fred2       | buccal cells, swab |                 | 366989                     | 13486        | 16569                     | 8                | 61              | 114              |                  | 0              | 0          | 0           | R9c1              |
| lfu1056 | lfugao         | fred2       | buccal cells, swab |                 | 310085                     | 18923        | 16562                     | 12               | 86              | 127              |                  | 0              | 0          | 0           | B5b1c             |
| lfu1021 | lfugao         | plate 7B    | buccal cells, swab |                 | 201983                     | 89017        | 16557                     | 29               | 405             | 625              |                  | 0              | 0          | 1           | B4b1a2            |
| lfu1023 | lfugao         | plate 7B    | buccal cells, swab |                 | 97432                      | 25375        | 16568                     | 24               | 115             | 231              |                  | 0              | 0          | 0           | M7c3c             |
| lfu1029 | lfugao         | plate 7B    | buccal cells, swab |                 | 227870                     | 115994       | 16569                     | 112              | 527             | 752              |                  | 0              | 0          | 0           | D5b1c             |
| lfu1032 | lfugao         | plate 7B    | buccal cells, swab |                 | 716578                     | 420900       | 16568                     | 188              | 1914            | 3073             |                  | 0              | 0          | 2           | Y2a1              |
| lfu1034 | lfugao         | plate 7B    | buccal cells, swab |                 | 305389                     | 103747       | 16562                     | 113              | 472             | 714              |                  | 0              | 0          | 0           | B5b1c             |
| lfu1035 | lfugao         | plate 7B    | buccal cells, swab |                 | 275890                     | 156704       | 16567                     | 19               | 713             | 1228             |                  | 0              | 0          | 0           | B4b1a2            |
| lfu1036 | lfugao         | plate 7B    | buccal cells, swab |                 | 310933                     | 143473       | 16567                     | 171              | 652             | 1067             |                  | 0              | 0          | 0           | M7c3c             |
| lfu1040 | lfugao         | plate 7B    | buccal cells, swab |                 | 606257                     | 341002       | 16568                     | 136              | 1552            | 2258             |                  | 0              | 0          | 0           | B4a1a             |
| lfu1041 | lfugao         | plate 7B    | buccal cells, swab |                 | 325311                     | 168734       | 16571                     | 62               | 768             | 1226             |                  | 0              | 0          | 1           | B5b1c             |
| lfu1045 | lfugao         | plate 7B    | buccal cells, swab |                 | 235379                     | 88476        | 16569                     | 131              | 402             | 727              |                  | 0              | 0          | 0           | M7c3c             |
| lfu1048 | lfugao         | plate 7B    | buccal cells, swab |                 | 372528                     | 207301       | 16569                     | 62               | 943             | 1540             |                  | 0              | 0          | 1           | B5b1c             |
| lfu1049 | lfugao         | plate 7B    | buccal cells, swab |                 | 451738                     | 262510       | 16568                     | 119              | 1195            | 1850             |                  | 0              | 0          | 1           | R9c1              |
| Kny1016 | Kankanaey      | fred3       | buccal cells, swab | 1997            | 365178                     | 22194        | 16554                     | 5                | 100             | 183              | 185              | 0              | 0          | 0           | B4a1a             |
| Kny2484 | Kankanaey      | fred3       | buccal cells, swab |                 | 378239                     | 26878        | 16555                     | 35               | 122             | 158              |                  | 0              | 0          | 0           | B4a1a             |
| Kny2496 | Kankanaey      | fred3       | buccal cells, swab |                 | 459608                     | 30612        | 16569                     | 49               | 139             | 176              |                  | 0              | 0          | 0           | M7c3c             |
| Kny947  | Kankanaey      | fred3       | buccal cells, swab |                 | 396406                     | 24507        | 16560                     | 20               | 110             | 163              |                  | 0              | 0          | 0           | B5b1c             |
| Kny948  | Kankanaey      | fred3       | buccal cells, swab |                 | 457783                     | 21825        | 16569                     | 25               | 98              | 159              |                  | 0              | 0          | 0           | F3b               |
| Kny965  | Kankanaey      | fred3       | buccal cells, swab |                 | 467791                     | 29254        | 16571                     | 43               | 133             | 160              |                  | 0              | 0          | 0           | E1a1a1            |
| Kny966  | Kankanaey      | fred3       | buccal cells, swab |                 | 246808                     | 24185        | 16569                     | 26               | 110             | 147              |                  | 0              | 0          | 0           | M7c3c             |
| Kny967  | Kankanaey      | fred3       | buccal cells, swab |                 | 157213                     | 21844        | 16569                     | 29               | 99              | 148              |                  | 0              | 0          | 0           | M7c3c             |
| Kny970  | Kankanaey      | fred3       | buccal cells, swab |                 | 228006                     | 24697        | 16563                     | 22               | 113             | 148              |                  | 0              | 0          | 0           | B5b1c             |
| Kny972  | Kankanaey      | fred3       | buccal cells, swab |                 | 354381                     | 30039        | 16569                     | 50               | 137             | 164              |                  | 0              | 0          | 0           | F3b               |
| Kny973  | Kankanaey      | fred3       | buccal cells, swab |                 | 452200                     | 29994        | 16569                     | 37               | 137             | 164              |                  | 0              | 0          | 0           | M7c3c             |
| Kny974  | Kankanaey      | fred3       | buccal cells, swab |                 | 296543                     | 27752        | 16560                     | 30               | 126             | 160              |                  | 0              | 0          | 0           | B4b1a2            |

|         |                    |          |                    |      |         |         |       |     |      |       |      |   |    |        |               |
|---------|--------------------|----------|--------------------|------|---------|---------|-------|-----|------|-------|------|---|----|--------|---------------|
| Kny975  | Kankanaey          | fred3    | buccal cells, swab |      | 381387  | 29389   | 16563 | 43  | 134  | 163   | 0    | 0 | 0  | B5b1c  |               |
| Kny976  | Kankanaey          | fred3    | buccal cells, swab |      | 182749  | 16593   | 16570 | 14  | 75   | 120   | 0    | 0 | 0  | Y2a1   |               |
| Kny977  | Kankanaey          | fred3    | buccal cells, swab |      | 497274  | 31508   | 16569 | 62  | 143  | 170   | 0    | 0 | 0  | Y2a1   |               |
| Kny978  | Kankanaey          | fred3    | buccal cells, swab |      | 328309  | 24032   | 16570 | 30  | 109  | 149   | 0    | 0 | 0  | Y2a1   |               |
| Kny979  | Kankanaey          | fred3    | buccal cells, swab |      | 481209  | 27729   | 16556 | 34  | 126  | 157   | 0    | 0 | 0  | B4a1a  |               |
| Kny980  | Kankanaey          | fred3    | buccal cells, swab |      | 164402  | 16600   | 16569 | 17  | 76   | 111   | 0    | 0 | 0  | M7c3c  |               |
| Kny981  | Kankanaey          | fred3    | buccal cells, swab |      | 447681  | 30321   | 16570 | 59  | 138  | 165   | 0    | 0 | 0  | Y2a1   |               |
| Kny982  | Kankanaey          | fred3    | buccal cells, swab |      | 246872  | 20109   | 16560 | 17  | 91   | 130   | 0    | 0 | 0  | B4b1a2 |               |
| Kny983  | Kankanaey          | fred3    | buccal cells, swab |      | 460900  | 31899   | 16555 | 54  | 145  | 175   | 0    | 0 | 0  | B4a1a  |               |
| Kny985  | Kankanaey          | fred3    | buccal cells, swab |      | 364447  | 26763   | 16570 | 32  | 122  | 157   | 0    | 0 | 0  | Y2a1   |               |
| Kny986  | Kankanaey          | fred3    | buccal cells, swab |      | 341417  | 29846   | 16563 | 54  | 136  | 162   | 0    | 0 | 0  | B5b1c  |               |
| Kny988  | Kankanaey          | fred3    | buccal cells, swab |      | 496663  | 30121   | 16569 | 49  | 137  | 164   | 0    | 0 | 0  | F3b    |               |
| Kny991  | Kankanaey          | fred3    | buccal cells, swab |      | 401552  | 29537   | 16560 | 54  | 135  | 163   | 0    | 0 | 0  | B4b1a2 |               |
| Kny992  | Kankanaey          | fred3    | buccal cells, swab |      | 518972  | 31253   | 16569 | 51  | 142  | 185   | 0    | 0 | 0  | D5b1c  |               |
| Kny994  | Kankanaey          | fred3    | buccal cells, swab |      | 350954  | 29360   | 16569 | 45  | 134  | 162   | 0    | 0 | 0  | M7c3c  |               |
| Kny995  | Kankanaey          | fred3    | buccal cells, swab |      | 453177  | 33093   | 16562 | 54  | 151  | 180   | 0    | 0 | 0  | B5b1c  |               |
| Kny964  | Kankanaey          | plate 7B | buccal cells, swab |      | 414010  | 243478  | 16564 | 87  | 1109 | 1798  | 0    | 0 | 3  | B4a1a  |               |
| Kny968  | Kankanaey          | plate 7B | buccal cells, swab |      | 395514  | 224001  | 16570 | 186 | 1020 | 1525  | 0    | 0 | 2  | E1a1a1 |               |
| AeZ1769 | Aeta from Zambales | plate 8A | blood on FTA card  | 1998 | 993218  | 2284    | 16566 | 0   | 10   | 72    | 10   | 1 | 10 | 109    | M52a          |
| AeZ1779 | Aeta from Zambales | plate 8A | blood on FTA card  |      | 1351261 | 2956    | 16567 | 1   | 13   | 84    |      | 0 | 0  | 18     | M             |
| AeZ1783 | Aeta from Zambales | plate 8A | blood on FTA card  |      | 1015622 | 2028    | 16566 | 0   | 9    | 79    |      | 1 | 12 | 119    | M52a          |
| AeZ1785 | Aeta from Zambales | plate 8A | blood on FTA card  |      | 1026887 | 2187    | 16570 | 0   | 9    | 69    |      | 2 | 11 | 105    | M52'58        |
| AeZ1787 | Aeta from Zambales | plate 8A | blood on FTA card  |      | 1038872 | 2636    | 16566 | 1   | 12   | 75    |      | 0 | 0  | 86     | M52'58        |
| AeZ1789 | Aeta from Zambales | plate 8A | blood on FTA card  |      | 968435  | 2179    | 16567 | 0   | 9    | 74    |      | 1 | 17 | 90     | M52a          |
| AeZ1790 | Aeta from Zambales | plate 8A | blood on FTA card  |      | 1106004 | 2511    | 16567 | 1   | 11   | 86    |      | 0 | 0  | 29     | M52a          |
| AeZ1791 | Aeta from Zambales | plate 8A | blood on FTA card  |      | 1208424 | 2895    | 16567 | 2   | 13   | 85    |      | 0 | 0  | 12     | M52'58        |
| AeZ1794 | Aeta from Zambales | plate 8A | blood on FTA card  |      | 783942  | 2122    | 16566 | 1   | 9    | 62    |      | 0 | 0  | 39     | M             |
| AeZ1795 | Aeta from Zambales | plate 8A | blood on FTA card  |      | 943056  | 2154    | 16567 | 0   | 9    | 73    |      | 1 | 12 | 99     | M52a          |
| Bug3242 | Bugkalot           | fred2    | buccal cells, swab | 2002 | 322288  | 6854    | 16568 | 4   | 31   | 71    | 331  | 0 | 0  | 0      | Y2a1          |
| Bug3245 | Bugkalot           | fred2    | buccal cells, swab |      | 372819  | 9329    | 16568 | 8   | 42   | 78    |      | 0 | 0  | 0      | M7c3c         |
| Bug3246 | Bugkalot           | fred2    | buccal cells, swab |      | 298162  | 6453    | 16566 | 6   | 29   | 58    |      | 0 | 0  | 0      | F1a4a         |
| Bug3259 | Bugkalot           | fred2    | buccal cells, swab |      | 342061  | 16649   | 16571 | 19  | 76   | 118   |      | 0 | 0  | 0      | Y2a1          |
| Bug3263 | Bugkalot           | fred2    | buccal cells, swab |      | 561669  | 23171   | 16570 | 25  | 104  | 176   |      | 0 | 0  | 0      | E1a1a1        |
| Bug3264 | Bugkalot           | fred2    | buccal cells, swab |      | 890009  | 19023   | 16568 | 14  | 86   | 135   |      | 0 | 0  | 0      | F3b1          |
| Bug3266 | Bugkalot           | fred2    | buccal cells, swab |      | 654991  | 29280   | 16570 | 34  | 131  | 189   |      | 0 | 0  | 0      | Y2a1          |
| Bug3268 | Bugkalot           | fred2    | buccal cells, swab |      | 587482  | 23821   | 16568 | 22  | 108  | 149   |      | 0 | 0  | 0      | M7c3c         |
| Bug3270 | Bugkalot           | fred2    | buccal cells, swab |      | 550048  | 17235   | 16569 | 12  | 78   | 126   |      | 0 | 0  | 0      | M7c3c         |
| Bug3275 | Bugkalot           | fred2    | buccal cells, swab |      | 611024  | 31900   | 16568 | 56  | 145  | 181   |      | 0 | 0  | 0      | M7c3c         |
| Bug3283 | Bugkalot           | fred2    | buccal cells, swab |      | 552038  | 17801   | 16571 | 10  | 81   | 129   |      | 0 | 0  | 0      | E1a1a1        |
| Bug3284 | Bugkalot           | fred2    | buccal cells, swab |      | 439577  | 18300   | 16559 | 20  | 83   | 131   |      | 0 | 0  | 0      | B5b1c         |
| Bug3285 | Bugkalot           | fred2    | buccal cells, swab |      | 364432  | 14510   | 16570 | 8   | 66   | 112   |      | 0 | 0  | 0      | R9c1          |
| Bug3286 | Bugkalot           | fred2    | buccal cells, swab |      | 349421  | 19886   | 16569 | 22  | 90   | 135   |      | 0 | 0  | 0      | M7c3c         |
| Bug3288 | Bugkalot           | fred2    | buccal cells, swab |      | 382081  | 16328   | 16570 | 16  | 74   | 118   |      | 0 | 0  | 0      | Y2a1          |
| Bug3229 | Bugkalot           | plate 7B | buccal cells, swab |      | 389427  | 117221  | 16569 | 120 | 533  | 866   |      | 0 | 0  | 0      | M7c3c         |
| Bug3230 | Bugkalot           | plate 7B | buccal cells, swab |      | 461757  | 246100  | 16564 | 223 | 1119 | 1799  |      | 0 | 0  | 1      | F1a4a         |
| Bug3232 | Bugkalot           | plate 7B | buccal cells, swab |      | 384131  | 118541  | 16564 | 88  | 538  | 866   |      | 0 | 0  | 0      | F1a4a         |
| Bug3234 | Bugkalot           | plate 7B | buccal cells, swab |      | 280015  | 60961   | 16566 | 67  | 277  | 498   |      | 0 | 0  | 1      | M7c3c         |
| Bug3235 | Bugkalot           | plate 7B | buccal cells, swab |      | 362785  | 101021  | 16564 | 86  | 460  | 690   |      | 0 | 0  | 0      | F1a4a         |
| Bug3236 | Bugkalot           | plate 7B | buccal cells, swab |      | 441012  | 172702  | 16569 | 163 | 785  | 1298  |      | 0 | 0  | 0      | Y2a1          |
| Bug3237 | Bugkalot           | plate 7B | buccal cells, swab |      | 429635  | 182508  | 16570 | 188 | 830  | 1410  |      | 0 | 0  | 0      | Y2a1          |
| Bug3238 | Bugkalot           | plate 7B | buccal cells, swab |      | 321243  | 149676  | 16568 | 148 | 681  | 1057  |      | 0 | 0  | 1      | M7c3c         |
| Bug3243 | Bugkalot           | plate 7B | buccal cells, swab |      | 365932  | 165360  | 16568 | 239 | 751  | 1471  |      | 0 | 0  | 0      | M7c3c         |
| Bug3244 | Bugkalot           | plate 7B | buccal cells, swab |      | 282092  | 125698  | 16568 | 130 | 571  | 935   |      | 0 | 0  | 0      | M7c3c         |
| Bug3247 | Bugkalot           | plate 7B | buccal cells, swab |      | 212021  | 37041   | 16566 | 37  | 168  | 259   |      | 0 | 0  | 1      | M7c3c         |
| Bug3262 | Bugkalot           | plate 7B | buccal cells, swab |      | 52622   | 27010   | 16571 | 5   | 122  | 292   |      | 0 | 0  | 1      | E1a1          |
| Bug3269 | Bugkalot           | plate 7B | buccal cells, swab |      | 430929  | 201596  | 16570 | 278 | 916  | 1432  |      | 0 | 0  | 0      | P2'10         |
| Bug3271 | Bugkalot           | plate 7B | buccal cells, swab |      | 206488  | 135156  | 16569 | 106 | 613  | 1453  |      | 0 | 0  | 2      | E1a1a1        |
| Bug3272 | Bugkalot           | plate 7B | buccal cells, swab |      | 137837  | 73920   | 16570 | 126 | 335  | 551   |      | 0 | 0  | 0      | P2'10         |
| Iva3300 | Ivatan             | plate 7B | buccal cells, swab | 2002 | 317781  | 231041  | 16565 | 87  | 1051 | 1695  | 2607 | 0 | 0  | 0      | F1a3a         |
| Iva3302 | Ivatan             | plate 7B | buccal cells, swab |      | 600326  | 314823  | 16570 | 405 | 1432 | 2129  |      | 0 | 0  | 0      | Y2a1          |
| Iva3304 | Ivatan             | plate 7B | buccal cells, swab |      | 1780808 | 1317058 | 16570 | 500 | 5997 | 8479  |      | 0 | 0  | 0      | E1a1a         |
| Iva3309 | Ivatan             | plate 7B | buccal cells, swab |      | 252062  | 193250  | 16567 | 335 | 879  | 1616  |      | 0 | 0  | 0      | F1a3a         |
| Iva3311 | Ivatan             | plate 7B | buccal cells, swab |      | 655089  | 549021  | 16559 | 429 | 2502 | 6186  |      | 0 | 0  | 0      | B4a1a3        |
| Iva3318 | Ivatan             | plate 7B | buccal cells, swab |      | 306537  | 251760  | 16565 | 71  | 1147 | 1972  |      | 0 | 0  | 0      | B4a1a5        |
| Iva3321 | Ivatan             | plate 7B | buccal cells, swab |      | 487898  | 363968  | 16567 | 500 | 1655 | 2773  |      | 0 | 0  | 0      | M7c3-T16295C! |
| Iva3324 | Ivatan             | plate 7B | buccal cells, swab |      | 684883  | 549268  | 16568 | 301 | 2501 | 4609  |      | 0 | 0  | 1      | R9c1a         |
| Iva3325 | Ivatan             | plate 7B | buccal cells, swab |      | 429773  | 314117  | 16568 | 197 | 1423 | 14222 |      | 0 | 0  | 2      | Y2a1          |
| Iva3327 | Ivatan             | plate 7B | buccal cells, swab |      | 211202  | 143707  | 16567 | 179 | 654  | 1568  |      | 0 | 0  | 0      | R9c1a         |
| Iva3329 | Ivatan             | plate 7B | buccal cells, swab |      | 66540   | 22032   | 16560 | 36  | 100  | 219   |      | 0 | 0  | 2      | B5b1c         |

|          |                  |          |                                  |      |         |         |       |     |       |       |     |    |    |               |          |
|----------|------------------|----------|----------------------------------|------|---------|---------|-------|-----|-------|-------|-----|----|----|---------------|----------|
| Iva3330  | Ivatan           | plate 7B | buccal cells, swab               |      | 1085533 | 635656  | 16567 | 500 | 2891  | 5537  | 0   | 0  | 0  | M7c3-T16295C! |          |
| Iva3331  | Ivatan           | plate 7B | buccal cells, swab               |      | 47940   | 22035   | 16567 | 29  | 100   | 329   | 0   | 0  | 0  | M7c3-T16295C! |          |
| Iva3332  | Ivatan           | plate 7B | buccal cells, swab               |      | 3483065 | 2974578 | 16567 | 500 | 13527 | 22907 | 0   | 0  | 1  | B4c1b2a2      |          |
| Iva3333  | Ivatan           | plate 7B | buccal cells, swab               |      | 80494   | 41948   | 16567 | 24  | 190   | 425   | 0   | 0  | 0  | B4a1a4        |          |
| Iva3334  | Ivatan           | plate 7B | buccal cells, swab               |      | 399464  | 139752  | 16559 | 121 | 636   | 1111  | 0   | 0  | 1  | B4a1a3        |          |
| Iva3336  | Ivatan           | plate 7B | buccal cells, swab               |      | 3557180 | 3035900 | 16566 | 500 | 13826 | 20098 | 0   | 0  | 0  | F1a3a         |          |
| Iva3346  | Ivatan           | plate 7B | buccal cells, swab               |      | 31621   | 2523    | 16563 | 2   | 11    | 27    | 0   | 0  | 18 | R             |          |
| Iva3374  | Ivatan           | plate 7B | buccal cells, swab               |      | 878962  | 741834  | 16567 | 500 | 3374  | 5556  | 0   | 0  | 0  | F1a3a         |          |
| Iva3384  | Ivatan           | plate 7B | buccal cells, swab               |      | 294031  | 215817  | 16568 | 353 | 980   | 2759  | 0   | 0  | 1  | R9c1a         |          |
| Iva3407  | Ivatan           | plate 7B | buccal cells, swab               |      | 299520  | 225543  | 16567 | 249 | 1026  | 1817  | 0   | 0  | 0  | M7c3-T16295C! |          |
| Iva3424  | Ivatan           | plate 7B | buccal cells, swab               |      | 87033   | 51624   | 16565 | 20  | 235   | 639   | 0   | 0  | 1  | B4a1a4        |          |
| Iva3432  | Ivatan           | plate 7B | buccal cells, swab               |      | 635376  | 283877  | 16570 | 305 | 1292  | 2073  | 0   | 0  | 0  | E1a1a         |          |
| Iva3459  | Ivatan           | plate 7B | buccal cells, swab               |      | 3894953 | 3094732 | 16561 | 500 | 14081 | 23364 | 0   | 0  | 0  | B4c1b2a2      |          |
| Iva3476  | Ivatan           | plate 7B | buccal cells, swab               |      | 519027  | 233931  | 16561 | 217 | 1064  | 1563  | 0   | 0  | 0  | B4c1b2a2      |          |
| Iva3481  | Ivatan           | plate 7B | buccal cells, swab               |      | 376437  | 114053  | 16567 | 139 | 519   | 976   | 0   | 0  | 0  | F1a3a         |          |
| Iva3484  | Ivatan           | plate 7B | buccal cells, swab               |      | 425938  | 116629  | 16560 | 143 | 529   | 1097  | 0   | 0  | 0  | B4c1b2a2      |          |
| Iva3492  | Ivatan           | plate 7B | buccal cells, swab               |      | 547373  | 253799  | 16568 | 91  | 1154  | 3008  | 0   | 0  | 1  | B5b1c         |          |
| Iva3508  | Ivatan           | plate 7B | buccal cells, swab               |      | 477066  | 185039  | 16559 | 120 | 841   | 1444  | 0   | 0  | 2  | B5a2a         |          |
| Kla3586  | Kalangoya        | fred3    | buccal cells, swab               | 2002 | 554362  | 30608   | 16568 | 53  | 139   | 169   | 208 | 0  | 0  | 0             | M7c3c    |
| Kla3590  | Kalangoya        | fred3    | buccal cells, swab               |      | 392994  | 19442   | 16569 | 14  | 88    | 139   | 0   | 0  | 0  | 0             | M7c3c    |
| Kla3591  | Kalangoya        | fred3    | buccal cells, swab               |      | 1030823 | 48095   | 16568 | 100 | 212   | 322   | 0   | 0  | 0  | 0             | M7c3c    |
| Kla3592  | Kalangoya        | fred3    | buccal cells, swab               |      | 486535  | 24019   | 16560 | 22  | 109   | 153   | 0   | 0  | 0  | 0             | B4a1a    |
| Kla3596  | Kalangoya        | fred3    | buccal cells, swab               |      | 230134  | 27379   | 16562 | 37  | 124   | 196   | 0   | 0  | 0  | 0             | B5b1c    |
| Kla3597  | Kalangoya        | fred3    | buccal cells, swab               |      | 610020  | 34829   | 16562 | 77  | 158   | 219   | 0   | 0  | 0  | 0             | B5b1c    |
| Kla3605  | Kalangoya        | fred3    | buccal cells, swab               |      | 457312  | 27401   | 16562 | 26  | 124   | 166   | 0   | 0  | 0  | 0             | B5b1c    |
| Kla3606  | Kalangoya        | fred3    | buccal cells, swab               |      | 155369  | 19198   | 16563 | 13  | 87    | 189   | 0   | 0  | 0  | 0             | B5b1c    |
| Kla3607  | Kalangoya        | fred3    | buccal cells, swab               |      | 380745  | 21844   | 16568 | 22  | 99    | 159   | 0   | 0  | 0  | 0             | M7c3c    |
| Kla3608  | Kalangoya        | fred3    | buccal cells, swab               |      | 1416817 | 43589   | 16560 | 113 | 194   | 275   | 0   | 0  | 0  | 0             | B4a1a    |
| Kla3612  | Kalangoya        | fred3    | buccal cells, swab               |      | 116297  | 13420   | 16568 | 12  | 61    | 125   | 0   | 0  | 0  | 0             | M7c3c    |
| Kla3621  | Kalangoya        | fred3    | buccal cells, swab               |      | 226352  | 29255   | 16568 | 39  | 132   | 202   | 0   | 0  | 0  | 0             | M7c3c    |
| Kla3622  | Kalangoya        | fred3    | buccal cells, swab               |      | 687327  | 40618   | 16568 | 87  | 182   | 256   | 0   | 0  | 0  | 0             | M7c3c    |
| Kla3623  | Kalangoya        | fred3    | buccal cells, swab               |      | 433394  | 30112   | 16560 | 31  | 137   | 185   | 0   | 0  | 0  | 0             | B4a1a    |
| Kla3625  | Kalangoya        | fred3    | buccal cells, swab               |      | 180325  | 10883   | 16568 | 4   | 49    | 97    | 0   | 0  | 0  | 0             | M7c3c    |
| Kla3626  | Kalangoya        | fred3    | buccal cells, swab               |      | 167840  | 14615   | 16569 | 13  | 66    | 119   | 0   | 0  | 0  | 0             | M7c3c    |
| Kla3627  | Kalangoya        | fred3    | buccal cells, swab               |      | 572107  | 30393   | 16560 | 45  | 138   | 187   | 0   | 0  | 0  | 0             | B4a1a    |
| Kla3634  | Kalangoya        | fred3    | buccal cells, swab               |      | 447909  | 33206   | 16568 | 61  | 150   | 220   | 0   | 0  | 0  | 0             | M7c3c    |
| Kla3635  | Kalangoya        | fred3    | buccal cells, swab               |      | 264212  | 19575   | 16560 | 9   | 89    | 157   | 0   | 0  | 0  | 0             | B4a1a    |
| Kla3638  | Kalangoya        | fred3    | buccal cells, swab               |      | 367337  | 22387   | 16556 | 12  | 102   | 149   | 0   | 0  | 0  | 0             | B4a1a    |
| Kla3640  | Kalangoya        | fred3    | buccal cells, swab               |      | 786127  | 38292   | 16568 | 82  | 172   | 224   | 0   | 0  | 0  | 0             | M7c3c    |
| Kla3641  | Kalangoya        | fred3    | buccal cells, swab               |      | 679078  | 33610   | 16562 | 71  | 152   | 201   | 0   | 0  | 0  | 0             | B5b1c    |
| Kla3644  | Kalangoya        | fred3    | buccal cells, swab               |      | 599839  | 31208   | 16568 | 58  | 142   | 180   | 0   | 0  | 0  | 0             | M7c3c    |
| Kla3633  | Kalangoya        | plate 7B | buccal cells, swab               |      | 759012  | 385735  | 16566 | 148 | 1756  | 2641  | 0   | 0  | 0  | 0             | B4a1a5   |
| Kla3636  | Kalangoya        | plate 7B | buccal cells, swab               |      | 101684  | 72118   | 16564 | 40  | 328   | 612   | 0   | 0  | 0  | 0             | F1a4a    |
| Kla3643  | Kalangoya        | plate 7B | buccal cells, swab               |      | 367979  | 89576   | 16560 | 63  | 407   | 693   | 0   | 0  | 0  | 0             | B5b1c    |
| Mara3215 | Maranao          | fred3    | buccal cells, swab               | 2002 | 283896  | 23925   | 16570 | 28  | 109   | 158   | 397 | 0  | 0  | 0             | D6c      |
| Mara3676 | Maranao          | fred3    | buccal cells, swab               |      | 505756  | 30992   | 16570 | 47  | 141   | 179   | 0   | 0  | 0  | 0             | Y2a      |
| Mara3677 | Maranao          | fred3    | buccal cells, swab               |      | 214328  | 14326   | 16569 | 13  | 65    | 107   | 0   | 0  | 0  | 0             | P1d1     |
| Mara3680 | Maranao          | fred3    | buccal cells, swab               |      | 635387  | 34729   | 16557 | 62  | 157   | 215   | 0   | 0  | 0  | 0             | B4b1a2   |
| Mara3681 | Maranao          | fred3    | buccal cells, swab               |      | 857552  | 42435   | 16570 | 93  | 190   | 330   | 0   | 0  | 0  | 0             | M7b3a    |
| Mara3682 | Maranao          | fred3    | buccal cells, swab               |      | 1092183 | 39386   | 16568 | 86  | 177   | 249   | 0   | 0  | 0  | 0             | F3b1     |
| Mara3684 | Maranao          | fred3    | buccal cells, swab               |      | 344010  | 34933   | 16570 | 63  | 158   | 201   | 0   | 0  | 0  | 0             | D6c      |
| Mara3705 | Maranao          | fred3    | buccal cells, swab               |      | 284747  | 16584   | 16570 | 6   | 75    | 149   | 0   | 0  | 0  | 0             | M7b3a    |
| Mara3710 | Maranao          | fred3    | buccal cells, swab               |      | 336687  | 19526   | 16561 | 8   | 89    | 168   | 0   | 0  | 0  | 0             | B4a1     |
| Mara3181 | Maranao          | plate 7B | buccal cells, swab               |      | 19887   | 4171    | 16559 | 0   | 19    | 45    | 1   | 10 | 15 | 0             | B4c1b2a2 |
| Mara3182 | Maranao          | plate 7B | buccal cells, swab               |      | 24105   | 5674    | 16571 | 1   | 25    | 54    | 0   | 0  | 2  | 0             | D6c      |
| Mara3214 | Maranao          | plate 7B | buccal cells, swab               |      | 150669  | 80766   | 16557 | 52  | 368   | 684   | 0   | 0  | 0  | 0             | B4b1a2b  |
| Mara3675 | Maranao          | plate 7B | buccal cells, swab               |      | 650592  | 471540  | 16568 | 250 | 2147  | 3031  | 0   | 0  | 4  | 0             | P2'10    |
| Mara3678 | Maranao          | plate 7B | buccal cells, swab               |      | 89941   | 45675   | 16569 | 55  | 207   | 391   | 0   | 0  | 0  | 0             | M50      |
| Mara3683 | Maranao          | plate 7B | buccal cells, swab               |      | 729623  | 421566  | 16557 | 425 | 1922  | 2577  | 0   | 0  | 0  | 0             | B4a1a1a  |
| Mara3702 | Maranao          | plate 7B | buccal cells, swab               |      | 286479  | 179770  | 16570 | 57  | 818   | 3077  | 0   | 0  | 0  | 0             | D6c      |
| Mara3706 | Maranao          | plate 7B | buccal cells, swab               |      | 515229  | 76980   | 16570 | 69  | 350   | 888   | 0   | 0  | 4  | 0             | E1a1a1   |
| Mara3707 | Maranao          | plate 7B | buccal cells, swab               |      | 37195   | 29356   | 16568 | 58  | 133   | 216   | 0   | 0  | 0  | 0             | R9c1a    |
| AeB4063  | Aeta from Bataan | plate 8A | buccal cells, saliva on FTA card | 2003 | 327550  | 7335    | 16561 | 2   | 33    | 88    | 98  | 0  | 0  | 1             | B4b1a    |
| AeB4066  | Aeta from Bataan | plate 8A | buccal cells, saliva on FTA card |      | 440019  | 12069   | 16557 | 3   | 54    | 114   | 0   | 0  | 0  | 0             | B4b1a2   |
| AeB4068  | Aeta from Bataan | plate 8A | buccal cells, saliva on FTA card |      | 489689  | 27047   | 16568 | 14  | 123   | 242   | 0   | 0  | 0  | 0             | P        |
| AeB4069  | Aeta from Bataan | plate 8A | buccal cells, saliva on FTA card |      | 415905  | 37068   | 16567 | 35  | 168   | 337   | 0   | 0  | 0  | 0             | P        |
| AeB4070  | Aeta from Bataan | plate 8A | buccal cells, saliva on FTA card |      | 376223  | 46674   | 16555 | 12  | 212   | 477   | 0   | 0  | 1  | 0             | B4b1a2   |
| AeB4072  | Aeta from Bataan | plate 8A | buccal cells, saliva on FTA card |      | 349678  | 78738   | 16569 | 80  | 358   | 701   | 0   | 0  | 0  | 0             | M7b3a    |
| AeB4073  | Aeta from Bataan | plate 8A | buccal cells, saliva on FTA card |      | 282126  | 3624    | 16558 | 0   | 16    | 54    | 1   | 2  | 19 | 0             | B4b1a2   |

|         |                  |          |                                  |      |         |        |       |     |     |      |     |   |    |               |        |
|---------|------------------|----------|----------------------------------|------|---------|--------|-------|-----|-----|------|-----|---|----|---------------|--------|
| AeB4074 | Aeta from Bataan | plate 8A | buccal cells, saliva on FTA card |      | 287716  | 10590  | 16561 | 6   | 48  | 126  | 0   | 0 | 1  | B4b1a         |        |
| AeB4077 | Aeta from Bataan | plate 8A | buccal cells, saliva on FTA card |      | 201378  | 4849   | 16567 | 0   | 22  | 57   | 1   | 1 | 43 | B4b1a2        |        |
| AeB4079 | Aeta from Bataan | plate 8A | buccal cells, saliva on FTA card |      | 253781  | 34275  | 16560 | 37  | 156 | 308  | 0   | 0 | 0  | B4b1a2        |        |
| AeB4080 | Aeta from Bataan | plate 8A | buccal cells, saliva on FTA card |      | 398415  | 52945  | 16567 | 35  | 241 | 482  | 0   | 0 | 1  | P             |        |
| AeB4081 | Aeta from Bataan | plate 8A | buccal cells, saliva on FTA card |      | 380049  | 12510  | 16561 | 15  | 56  | 136  | 0   | 0 | 2  | B4b1a2        |        |
| AeB4082 | Aeta from Bataan | plate 8A | buccal cells, saliva on FTA card |      | 137520  | 23872  | 16568 | 16  | 108 | 290  | 0   | 0 | 0  | P             |        |
| AeB4083 | Aeta from Bataan | plate 8A | buccal cells, saliva on FTA card |      | 132890  | 10260  | 16561 | 0   | 46  | 144  | 1   | 7 | 8  | B4b1a2        |        |
| AeB4086 | Aeta from Bataan | plate 8A | buccal cells, saliva on FTA card |      | 364043  | 15172  | 16561 | 12  | 69  | 149  | 0   | 0 | 0  | B4b1a2        |        |
| AeB4087 | Aeta from Bataan | plate 8A | buccal cells, saliva on FTA card |      | 401608  | 5032   | 16567 | 4   | 22  | 55   | 0   | 0 | 2  | P             |        |
| AeB4088 | Aeta from Bataan | plate 8A | buccal cells, saliva on FTA card |      | 517432  | 34206  | 16566 | 22  | 155 | 337  | 0   | 0 | 0  | P             |        |
| AeB4089 | Aeta from Bataan | plate 8A | buccal cells, saliva on FTA card |      | 342947  | 14239  | 16560 | 6   | 64  | 159  | 0   | 0 | 0  | B4b1a2        |        |
| AeB4090 | Aeta from Bataan | plate 8A | buccal cells, saliva on FTA card |      | 344418  | 10984  | 16568 | 6   | 49  | 112  | 0   | 0 | 0  | P             |        |
| AeB4094 | Aeta from Bataan | plate 8A | buccal cells, saliva on FTA card |      | 113997  | 7768   | 16568 | 5   | 35  | 106  | 0   | 0 | 10 | P             |        |
| AeB4097 | Aeta from Bataan | plate 8A | buccal cells, saliva on FTA card |      | 182394  | 26638  | 16568 | 21  | 121 | 264  | 0   | 0 | 0  | P             |        |
| AeB4098 | Aeta from Bataan | plate 8A | buccal cells, saliva on FTA card |      | 279051  | 4184   | 16561 | 3   | 19  | 52   | 0   | 0 | 4  | B4b1a         |        |
| AeB4103 | Aeta from Bataan | plate 8A | buccal cells, saliva on FTA card |      | 248446  | 17049  | 16566 | 11  | 77  | 164  | 0   | 0 | 0  | F1a3a         |        |
| Agl4385 | Agta from Iriga  | plate 8A | buccal cells, saliva on FTA card | 2004 | 1053686 | 2630   | 16567 | 0   | 11  | 74   | 28  | 1 | 10 | 49            | M52'58 |
| Agl4386 | Agta from Iriga  | plate 8A | buccal cells, saliva on FTA card |      | 820965  | 1982   | 16566 | 1   | 9   | 72   | 0   | 0 | 0  | 91            | M52'58 |
| Agl4392 | Agta from Iriga  | plate 8A | buccal cells, saliva on FTA card |      | 495410  | 7908   | 16560 | 3   | 36  | 222  | 0   | 0 | 0  | 9             | B4'5   |
| Agl4396 | Agta from Iriga  | plate 8A | buccal cells, saliva on FTA card |      | 868576  | 2339   | 16567 | 0   | 10  | 64   | 1   | 2 | 76 | M52'58        |        |
| Agl4397 | Agta from Iriga  | plate 8A | buccal cells, saliva on FTA card |      | 995536  | 2243   | 16566 | 1   | 10  | 67   | 0   | 0 | 0  | 47            | M52a   |
| Agl4398 | Agta from Iriga  | plate 8A | buccal cells, saliva on FTA card |      | 1024372 | 4308   | 16566 | 1   | 19  | 99   | 0   | 0 | 0  | 54            | M      |
| Agl4399 | Agta from Iriga  | plate 8A | buccal cells, saliva on FTA card |      | 781149  | 13665  | 16558 | 5   | 62  | 236  | 0   | 0 | 0  | 9             | B4b1a  |
| Agl4401 | Agta from Iriga  | plate 8A | buccal cells, saliva on FTA card |      | 1266166 | 3014   | 16567 | 0   | 13  | 100  | 1   | 4 | 36 | M52'58        |        |
| Agl4405 | Agta from Iriga  | plate 8A | buccal cells, saliva on FTA card |      | 630511  | 18779  | 16576 | 1   | 85  | 1180 | 0   | 0 | 12 | M7c3-T16295C! |        |
| Aba4956 | Abaknon          | plate 7A | buccal cells, saliva             | 2007 | 349072  | 103504 | 16569 | 77  | 471 | 744  | 313 | 0 | 0  | 0             | D6a    |
| Aba4957 | Abaknon          | plate 7A | buccal cells, saliva             |      | 169961  | 30366  | 16562 | 26  | 138 | 221  | 0   | 0 | 1  | B5b1c         |        |
| Aba4962 | Abaknon          | plate 7A | buccal cells, saliva             |      | 315067  | 85185  | 16562 | 102 | 388 | 619  | 0   | 0 | 1  | B5b1c         |        |
| Aba4963 | Abaknon          | plate 7A | buccal cells, saliva             |      | 186729  | 43000  | 16559 | 46  | 195 | 302  | 0   | 0 | 0  | B5a1d         |        |
| Aba4968 | Abaknon          | plate 7A | buccal cells, saliva             |      | 189154  | 33714  | 16563 | 35  | 153 | 253  | 0   | 0 | 0  | F1a4a         |        |
| Aba4969 | Abaknon          | plate 7A | buccal cells, saliva             |      | 201511  | 66495  | 16569 | 89  | 302 | 464  | 0   | 0 | 0  | E1a1a         |        |
| Aba4974 | Abaknon          | plate 7A | buccal cells, saliva             |      | 253109  | 68213  | 16559 | 56  | 311 | 462  | 0   | 0 | 0  | B4c1b2a2      |        |
| Aba4980 | Abaknon          | plate 7A | buccal cells, saliva             |      | 169510  | 29942  | 16570 | 49  | 136 | 234  | 0   | 0 | 0  | M7b3a         |        |
| Aba4983 | Abaknon          | plate 7A | buccal cells, saliva             |      | 221503  | 47424  | 16567 | 77  | 215 | 353  | 0   | 0 | 0  | M17c          |        |
| Aba4984 | Abaknon          | plate 7A | buccal cells, saliva             |      | 209606  | 48151  | 16569 | 54  | 218 | 326  | 0   | 0 | 0  | E1a1a         |        |
| Aba4987 | Abaknon          | plate 7A | buccal cells, saliva             |      | 307930  | 64238  | 16566 | 103 | 292 | 457  | 0   | 0 | 1  | F1a3a         |        |
| Aba4990 | Abaknon          | plate 7A | buccal cells, saliva             |      | 249006  | 48294  | 16570 | 56  | 220 | 352  | 0   | 0 | 0  | E1a1a         |        |
| Aba4992 | Abaknon          | plate 7A | buccal cells, saliva             |      | 337696  | 97836  | 16557 | 132 | 445 | 714  | 0   | 0 | 0  | B4a1a         |        |
| Aba4994 | Abaknon          | plate 7A | buccal cells, saliva             |      | 394878  | 78052  | 16559 | 60  | 355 | 613  | 0   | 0 | 0  | B4b1a2        |        |
| Aba4995 | Abaknon          | plate 7A | buccal cells, saliva             |      | 378179  | 73556  | 16570 | 105 | 335 | 531  | 0   | 0 | 0  | E1a1a         |        |
| Aba4997 | Abaknon          | plate 7A | buccal cells, saliva             |      | 374210  | 107954 | 16567 | 91  | 491 | 746  | 0   | 0 | 0  | B4a1a         |        |
| Aba5001 | Abaknon          | plate 7A | buccal cells, saliva             |      | 220142  | 58498  | 16559 | 55  | 266 | 471  | 0   | 0 | 0  | B4a1a         |        |
| Aba5006 | Abaknon          | plate 7A | buccal cells, saliva             |      | 251759  | 42343  | 16568 | 54  | 192 | 332  | 0   | 0 | 0  | M7c3c         |        |
| Aba5021 | Abaknon          | plate 7A | buccal cells, saliva             |      | 341756  | 58320  | 16561 | 100 | 265 | 415  | 0   | 0 | 0  | B5b1c         |        |
| Aba5033 | Abaknon          | plate 7A | buccal cells, saliva             |      | 410688  | 110033 | 16569 | 41  | 500 | 778  | 0   | 0 | 0  | B4b1a2        |        |
| Aba5037 | Abaknon          | plate 7A | buccal cells, saliva             |      | 376605  | 108066 | 16557 | 135 | 492 | 794  | 0   | 0 | 0  | B4a1a         |        |
| Aba5040 | Abaknon          | plate 7A | buccal cells, saliva             |      | 318303  | 55554  | 16569 | 66  | 253 | 381  | 0   | 0 | 0  | E1a1a         |        |
| Aba5041 | Abaknon          | plate 7A | buccal cells, saliva             |      | 268718  | 51413  | 16570 | 75  | 234 | 361  | 0   | 0 | 1  | E1a1a         |        |
| Aba5044 | Abaknon          | plate 7A | buccal cells, saliva             |      | 362086  | 89096  | 16567 | 188 | 406 | 587  | 0   | 0 | 0  | R-T16189C!    |        |
| Aba5046 | Abaknon          | plate 7A | buccal cells, saliva             |      | 282719  | 73502  | 16562 | 95  | 335 | 585  | 0   | 0 | 0  | B5b1c         |        |
| Aba5079 | Abaknon          | plate 7A | buccal cells, saliva             |      | 289331  | 65033  | 16562 | 61  | 296 | 453  | 0   | 0 | 1  | B4c1b2a2      |        |
| Aba5084 | Abaknon          | plate 7A | buccal cells, saliva             |      | 355859  | 77620  | 16560 | 72  | 353 | 532  | 0   | 0 | 0  | B4b1a2        |        |
| Aba5124 | Abaknon          | plate 7A | buccal cells, saliva             |      | 460200  | 108876 | 16567 | 189 | 495 | 765  | 0   | 0 | 0  | M17c          |        |
| Aba5140 | Abaknon          | plate 7A | buccal cells, saliva             |      | 364800  | 99661  | 16568 | 117 | 454 | 788  | 0   | 0 | 0  | M7c3c         |        |
| Aba5163 | Abaknon          | plate 7A | buccal cells, saliva             |      | 227871  | 43073  | 16566 | 31  | 196 | 318  | 0   | 0 | 0  | F1a4a         |        |

Reads mapped: reads that mapped to the mtDNA genome

N: ambiguous base

Haplogroup: assignments by mtDNABLE (Behar *et al.* 2012)

Supplementary Table 3. Group information for the Reference data set used in this study

| Group          | Sample size | Region          | Reference                                                                                                                                               |
|----------------|-------------|-----------------|---------------------------------------------------------------------------------------------------------------------------------------------------------|
| Andh           | 19          | South Asia      | Chandrasekar <i>et al.</i> 2009                                                                                                                         |
| BettaKuruba    | 30          | South Asia      | Chandrasekar <i>et al.</i> 2009                                                                                                                         |
| DongriBhill    | 42          | South Asia      | Chandrasekar <i>et al.</i> 2009                                                                                                                         |
| DirangMonpa    | 30          | South Asia      | Chandrasekar <i>et al.</i> 2009                                                                                                                         |
| Gallong        | 39          | South Asia      | Chandrasekar <i>et al.</i> 2009                                                                                                                         |
| JenuKuruba     | 79          | South Asia      | Chandrasekar <i>et al.</i> 2009                                                                                                                         |
| Kathodi        | 15          | South Asia      | Chandrasekar <i>et al.</i> 2009                                                                                                                         |
| Korku          | 15          | South Asia      | Chandrasekar <i>et al.</i> 2009                                                                                                                         |
| Kamar          | 53          | South Asia      | Chandrasekar <i>et al.</i> 2009                                                                                                                         |
| Katkari        | 21          | South Asia      | Chandrasekar <i>et al.</i> 2009                                                                                                                         |
| Kathakur       | 19          | South Asia      | Chandrasekar <i>et al.</i> 2009                                                                                                                         |
| Lachungpa      | 25          | South Asia      | Chandrasekar <i>et al.</i> 2009                                                                                                                         |
| Lepcha         | 20          | South Asia      | Chandrasekar <i>et al.</i> 2009                                                                                                                         |
| Madia          | 20          | South Asia      | Chandrasekar <i>et al.</i> 2009                                                                                                                         |
| Malpaharia     | 15          | South Asia      | Chandrasekar <i>et al.</i> 2009                                                                                                                         |
| Munda          | 30          | South Asia      | Chandrasekar <i>et al.</i> 2009                                                                                                                         |
| Mathakur       | 10          | South Asia      | Chandrasekar <i>et al.</i> 2009                                                                                                                         |
| NIhal          | 30          | South Asia      | Chandrasekar <i>et al.</i> 2009                                                                                                                         |
| PauriBhuiya    | 32          | South Asia      | Chandrasekar <i>et al.</i> 2009                                                                                                                         |
| SonowalKachari | 19          | South Asia      | Chandrasekar <i>et al.</i> 2009                                                                                                                         |
| Shertukpen     | 15          | South Asia      | Chandrasekar <i>et al.</i> 2009                                                                                                                         |
| Toto           | 28          | South Asia      | Chandrasekar <i>et al.</i> 2009                                                                                                                         |
| Wanchoo        | 22          | South Asia      | Chandrasekar <i>et al.</i> 2009                                                                                                                         |
| IndianMuslim   | 12          | South Asia      | Eaaswarkhanth <i>et al.</i> 2009                                                                                                                        |
| Bhargava       | 12          | South Asia      | Palanichamy <i>et al.</i> 2004                                                                                                                          |
| Chaturvedi     | 12          | South Asia      | Palanichamy <i>et al.</i> 2004                                                                                                                          |
| Brahmin        | 21          | South Asia      | Palanichamy <i>et al.</i> 2004                                                                                                                          |
| Reddy          | 19          | South Asia      | Palanichamy <i>et al.</i> 2004                                                                                                                          |
| Andaman        | 15          | South Asia      | Thangaraj <i>et al.</i> 2005                                                                                                                            |
| Vietnam        | 11          | Southeast Asia  | Hill <i>et al.</i> 2006, Soares <i>et al.</i> 2008, Tabbada <i>et al.</i> 2010                                                                          |
| Besemah        | 36          | Southeast Asia  | Gunnarsdóttir <i>et al.</i> 2011b                                                                                                                       |
| Semende        | 36          | Southeast Asia  | Gunnarsdóttir <i>et al.</i> 2011b                                                                                                                       |
| Bidayuh        | 23          | Southeast Asia  | Jinam <i>et al.</i> 2012                                                                                                                                |
| Jehai          | 24          | Southeast Asia  | Jinam <i>et al.</i> 2012                                                                                                                                |
| Seletar        | 21          | Southeast Asia  | Jinam <i>et al.</i> 2012                                                                                                                                |
| Temuan         | 18          | Southeast Asia  | Soares <i>et al.</i> 2008, Jinam <i>et al.</i> 2012                                                                                                     |
| Indonesia      | 41          | Southeast Asia  | Soares <i>et al.</i> 2008, Soares <i>et al.</i> 2011                                                                                                    |
| HanChinese     | 43          | North East Asia | Kong <i>et al.</i> 2003                                                                                                                                 |
| Japan          | 657         | North East Asia | Tanaka <i>et al.</i> 2004                                                                                                                               |
| Taiwan         | 27          | North East Asia | Trejaut <i>et al.</i> 2005, Soares <i>et al.</i> 2008, Tabbada <i>et al.</i> 2010, Soares <i>et al.</i> 2011                                            |
| Australia      | 13          | Australia       | van Holst Pellekaan <i>et al.</i> 2006, Hudjashov <i>et al.</i> 2007                                                                                    |
| Near Oceania   | 67          | Oceania         | Friedlaender <i>et al.</i> 2005, Merriwether <i>et al.</i> 2005, Pierson <i>et al.</i> 2006, Friedlaender <i>et al.</i> 2007, Soares <i>et al.</i> 2011 |
| Remote Oceania | 23          | Oceania         | Pierson <i>et al.</i> 2006, Soares <i>et al.</i> 2011                                                                                                   |

Supplementary Table 5. Estimates of FE group current effective population sizes ( $N_e$ ).

| Filipino group | n  | C       | A         |        |           | B         |        |           |
|----------------|----|---------|-----------|--------|-----------|-----------|--------|-----------|
|                |    |         | HPD lower | BE     | HPD upper | HPD lower | BE     | HPD upper |
| Ivatan         | 29 | 35,000  | 703       | 2,172  | 5,244     | 811       | 2,506  | 5,977     |
| Ifugao         | 29 | 100,000 | 606       | 2,636  | 9,404     | 720       | 2,814  | 9,192     |
| Kankanaey      | 30 | 150,000 | 428       | 1,839  | 7,038     | 530       | 1,880  | 6,532     |
| Ibaloi         | 26 | 111,000 | 417       | 1,730  | 5,783     | 523       | 1,925  | 5,674     |
| Kalangoya      | 26 | 15,000  | 389       | 2,438  | 10,286    | 449       | 2,293  | 9,299     |
| Bugkalot       | 30 | 50,800  | 278       | 856    | 2,116     | 357       | 1,013  | 2,301     |
| <u>AetaZ</u>   | 10 | 1,660   | -         | -      | -         | 28        | 228    | 971       |
| <u>AetaB</u>   | 23 | 2,000   | 211       | 858    | 2,630     | 283       | 1,052  | 3,019     |
| <u>AgtaI</u>   | 9  | 3,000   | 52        | 579    | 2,756     | 132       | 954    | 3,918     |
| Abaknon        | 30 | 214,000 | 930       | 3,307  | 8,232     | 1,050     | 3,733  | 9,233     |
| Surigaonon     | 24 | 345,000 | 1,035     | 3,927  | 9,868     | 1,133     | 4,641  | 11,092    |
| <u>Mamanwa</u> | 33 | 5,150   | 455       | 1,481  | 3,953     | 553       | 1,615  | 3,926     |
| Manobo         | 40 | 7,570   | 757       | 2,282  | 5,705     | 846       | 2,528  | 6,128     |
| Maranao        | 18 | 776,000 | 7,556     | 22,650 | 49,116    | 10,748    | 29,098 | 60,925    |

FEN groups are underlined; n: sample size; C: census sizes from Lewis 2009; BE (Bayesian estimate);

HPD: 95% highest posterior density or credible intervals (CI);

A:  $N_e$  estimated using FE group data only; B:  $N_e$  estimated including RSRS as tree root;

$N_e$  values were extrapolated using a generation time of 28 years

Values under 'A' columns are relevant to Supplementary Figure 4.

Values under 'B' columns are relevant to Supplementary Figure 5.

Supplementary Table 6. Haplogroups and frequencies (%) observed in FE and RC groups

| FE groups                  |       | RC groups     |       |         |          |           |       |
|----------------------------|-------|---------------|-------|---------|----------|-----------|-------|
| Sample size = 360          |       | Sample size = | 177   | 112     | 70       | 64        | 423   |
| Haplogroup                 | Total | Haplogroup    | Luzon | Visayas | Mindanao | Undefined | Total |
| B4a1                       | 0.28  | B4a           | 0.56  |         | 1.43     |           | 0.47  |
| B4a1a                      | 7.78  | B4a1a         | 11.3  | 9.82    | 10       | 12.5      | 10.87 |
| B4a1a1a                    | 0.28  | B4a1a1        |       |         | 1.43     | 1.56      | 0.47  |
| B4a1a3                     | 0.83  | B4b1          | 7.34  | 7.14    | 7.14     | 9.38      | 7.57  |
| B4a1a4                     | 0.56  | B4c1b         | 5.65  | 6.25    |          | 6.25      | 4.96  |
| B4a1a5                     | 1.11  |               |       |         |          |           |       |
| B4b1a                      | 1.39  |               |       |         |          |           |       |
| B4b1a2                     | 6.94  |               |       |         |          |           |       |
| B4b1a2b                    | 1.39  |               |       |         |          |           |       |
| B4b1a2d                    | 1.11  |               |       |         |          |           |       |
| B4c                        | 0.28  |               |       |         |          |           |       |
| B4c1b2a2                   | 3.89  |               |       |         |          |           |       |
| B5                         | 0.28  | B5a           | 1.13  |         |          | 1.56      | 0.71  |
| B5a1d                      | 0.28  | B5b           | 10.17 | 4.46    | 4.29     | 10.94     | 7.8   |
| B5a2a                      | 0.28  | B7            | 0.56  |         |          |           | 0.24  |
| B5b1c                      | 7.50  |               |       |         |          |           |       |
| D5b1c                      | 1.39  | D*            | 0.56  |         |          |           | 0.24  |
| D6a                        | 0.83  | D5b           | 0.56  |         |          | 1.56      | 0.47  |
| D6c                        | 1.11  | D6            | 1.13  | 0.89    | 2.86     | 1.56      | 1.42  |
| E1a1a                      | 4.44  | E1            |       | 0.89    |          |           | 0.24  |
| E1a1a1                     | 5.00  | E1a1a         | 7.91  | 16.07   | 14.29    | 7.81      | 11.11 |
| E2a                        | 0.83  | E1a2          |       |         |          | 1.56      | 0.24  |
| E2a1                       | 0.28  | E1b           | 2.82  |         | 1.43     |           | 1.42  |
| E2b1                       | 1.11  | E2*           | 1.13  | 4.46    | 5.71     | 3.13      | 3.07  |
|                            |       | E2b           | 0.56  |         |          |           | 0.24  |
| F1a3a                      | 1.94  | F1a1a         | 0.56  |         |          |           | 0.24  |
| F1a4a                      | 2.78  | F1a3          | 3.39  | 2.68    | 1.43     | 4.69      | 3.07  |
| F3b                        | 2.22  | F1a4          | 3.39  | 6.25    | 2.86     | 4.69      | 4.26  |
| F3b1                       | 0.56  | F3b           | 2.82  | 0.89    | 2.86     |           | 1.89  |
|                            |       | F4b           | 1.13  |         |          |           | 0.47  |
| M                          | 0.83  | M*            | 2.26  | 1.79    | 4.29     | 1.56      | 2.36  |
| M17c                       | 0.56  | M21a          |       | 0.89    |          | 1.56      | 0.47  |
| M21a                       | 0.28  | M21c1a        | 0.56  |         |          |           | 0.24  |
| M50                        | 0.28  | M17c1a        | 2.82  |         |          |           | 1.18  |
| M52'58                     | 1.94  | M71           |       | 0.89    | 1.43     |           | 0.47  |
| M52a                       | 1.67  | M72           | 0.56  |         |          |           | 0.24  |
| M74b1                      | 0.83  | M73a          |       | 1.79    |          |           | 0.47  |
| M7b1'2'4'5'6'7'8-(C16192T) | 0.28  | M7a           | 0.56  |         |          |           | 0.24  |
| M7b3a                      | 1.11  | M7b           |       |         | 1.43     |           | 0.24  |
| M7c3c                      | 16.11 | M7b1          | 1.69  | 1.79    |          |           | 1.18  |
| M7c3c1                     | 0.28  | M7b3          | 2.82  | 5.36    | 2.86     | 1.56      | 3.31  |
| M7c3-T16295C!              | 1.39  | M7c           | 1.13  | 1.79    | 1.43     |           | 1.18  |
| M13'46'61-T16362C          | 0.28  | M7c3c         | 12.99 | 7.14    | 12.86    | 12.5      | 11.35 |
|                            |       | M8a           | 0.56  |         |          |           | 0.24  |
| N11                        | 0.28  | N*            |       | 0.89    |          |           | 0.24  |
| N11b                       | 3.33  | N22           |       |         | 1.43     |           | 0.24  |
| P                          | 2.50  | P8            | 1.13  | 0.89    |          | 1.56      | 0.95  |
| P1d1                       | 0.28  | P10           |       | 0.89    | 1.43     |           | 0.47  |
| P2'10                      | 0.83  |               |       |         |          |           |       |
| Q1'2                       | 0.28  |               |       |         |          |           |       |
| R                          | 0.28  | R24           | 0.56  | 8.04    | 2.86     | 1.56      | 3.07  |
| R9b1a1                     | 0.28  | R9c           | 4.52  | 5.36    | 5.71     | 4.69      | 4.96  |
| R9c1                       | 0.83  | R9e           |       |         | 1.43     | 1.56      | 0.47  |
| R9c1a                      | 1.39  |               |       |         |          |           |       |
| R-T16189C!                 | 0.56  |               |       |         |          |           |       |
| Y2a                        | 0.28  | Y2            | 4.52  | 2.68    | 7.14     | 6.25      | 4.73  |
| Y2a1                       | 5.56  |               |       |         |          |           |       |
|                            |       | Z4            | 0.56  |         |          |           | 0.24  |

FE group total, as in 'Philippines' column, Table 2 of main manuscript  
RC group data from Tabbada *et al.* 2010.



Supplementary Table 9. Haplotypes (Ht) shared between FE groups and reference data set groups

| Ht | Ivatan | Ifugao | Kankanaey | Ibaloi | Kalangoya | Bugkalot | AetaZ | Agtal | Abaknon | Surigaonon | Mamanwa | Manobo | Maranao | Taiwan | Indonesia | Near Oceania |
|----|--------|--------|-----------|--------|-----------|----------|-------|-------|---------|------------|---------|--------|---------|--------|-----------|--------------|
| 1  | 0      | 0      | 0         | 0      | 0         | 1        | 0     | 0     | 5       | 1          | 5       | 2      | 1       | 1      | 6         | 0            |
| 2  | 0      | 0      | 0         | 2      | 1         | 3        | 0     | 0     | 2       | 0          | 0       | 0      | 0       | 0      | 1         | 0            |
| 3  | 1      | 4      | 4         | 5      | 4         | 7        | 10    | 6     | 1       | 0          | 1       | 5      | 0       | 1      | 4         | 0            |
| 4  | 0      | 0      | 0         | 0      | 0         | 0        | 0     | 0     | 0       | 1          | 1       | 0      | 0       | 0      | 1         | 0            |
| 5  | 0      | 0      | 2         | 1      | 1         | 0        | 0     | 0     | 1       | 1          | 1       | 0      | 0       | 1      | 2         | 1            |

Ht: haplotype numbers are arbitrary assignments; Indonesia includes counts for Besemah and Semende

Supplementary Table 10. Haplogroup diversity indices and coalescent times.

| Haplogroup<br>Group | Diversity Indices |     |      |     |      |      |      |      |     |      | Coalescent time |        |           |
|---------------------|-------------------|-----|------|-----|------|------|------|------|-----|------|-----------------|--------|-----------|
|                     | n                 | nHg | Hgf  | nHt | HtD  | SE   | MPD  | SE   | sHt | nsHt | HPD lower       | BE     | HPD upper |
| <b>B4a1a</b>        |                   |     |      |     |      |      |      |      |     |      |                 |        |           |
| Taiwan              | 27                | 10  | 0.37 | 10  | 1.00 | 0.04 | 4.33 | 2.34 | 1   | 1    | 5,672           | 10,264 | 15,650    |
| Philippines         | 360               | 38  | 0.11 | 20  | 0.94 | 0.02 | 3.44 | 1.80 | 1   | 7    | 7,015           | 11,446 | 16,478    |
| Indonesia           | 113               | 25  | 0.22 | 18  | 0.95 | 0.03 | 3.51 | 1.85 | 1   | 2    | 6,907           | 11,313 | 16,369    |
| Near Oceania        | 67                | 32  | 0.48 | 24  | 0.95 | 0.03 | 2.89 | 1.56 | 1   | 1    | 6,160           | 10,572 | 15,613    |
| Remote Oceania      | 23                | 16  | 0.70 | 10  | 0.93 | 0.04 | 2.41 | 1.38 | 0   | 0    | 4,761           | 7,131  | 9,927     |
| <b>E1a1a</b>        |                   |     |      |     |      |      |      |      |     |      |                 |        |           |
| Taiwan              | 27                | 3   | 0.11 | 3   | 1.00 | 0.27 | 4.67 | 3.13 | 1   | 1    | 2,774           | 8,211  | 14,579    |
| Philippines         | 360               | 33  | 0.09 | 12  | 0.77 | 0.07 | 1.44 | 0.90 | 1   | 15   | 3,748           | 8,353  | 13,901    |
| Indonesia           | 113               | 11  | 0.10 | 6   | 0.73 | 0.14 | 1.64 | 1.04 | 1   | 6    | 3,306           | 8,255  | 13,842    |
| <b>M7c3c</b>        |                   |     |      |     |      |      |      |      |     |      |                 |        |           |
| Philippines         | 360               | 59  | 0.16 | 19  | 0.72 | 0.06 | 1.76 | 1.03 | 1   | 34   | 5,261           | 10,091 | 15,966    |
| Indonesia           | 113               | 13  | 0.12 | 9   | 0.91 | 0.07 | 1.92 | 1.17 | 1   | 4    | 4,396           | 8,974  | 14,258    |

Diversity indices: based on complete mtDNA sequence data

Coalescent time: based on coding region data

n: sample size

nHg: number of samples in haplogroup

Hgf: haplogroup frequency

nHt: number of haplotypes

HtD: haplotype diversity

MPD: mean pairwise differences

SE: standard error

sHt: shared haplotype

nsHt: number of individuals that share haplotype

BE: Bayesian estimate

HPD: 95% highest posterior density or credible intervals (CI)

Indonesia: includes Besemah and Semende

B4a1a: includes sublineages B4a1a1 to B4a1a5

E1a1a: includes sublineage E1a1a1

M7c3c: includes sublineage M7c3c1
